# Supplementary material for: Cosmogenic nuclide-derived downcutting rates of canyons within large limestone plateaus of southern Massif Central (France) reveal a different regional speleogenesis of karst networks
Source: Copernicus journal article supplement (doi:10.5194/egusphere-2023-765), 2023-06-23
Supplement: Supplementary file 1 [file egusphere-2023-765-supplement.pdf]

Table S1. Sample locations, burial ages, and erosion rates from  $^{26}\text{Al}$  and  $^{10}\text{Be}$  in cave sediments. Longitude (Lon.) and latitude (Lat.) are given for the cave entrance but the altitude (Alt.) and the elevation relative to the base level are given for the sample. The Bueges river is a tributary of the Hérault river. All the details are given for the samples from this study (ts) and new computation of Malcles et al. (2020) (M), ages and relative elevations are given for Vernet et al. (2008) (V) and Sartégou et al. (2018) studies.

| Sample                                                  | Lon.<br>[°N] | Lat.<br>[°E] | Alt.<br>[m] | Elevation<br>relative to<br>regional base<br>level [m] | $^{26}\text{Al}$<br>[ $10^4$ atoms/g] | $^{10}\text{Be}$<br>[ $10^4$ atoms/g] | Burial age and<br>uncertainties [Ma] | Erosion rate and<br>uncertainties [m/Ma] | Nearest river | study |
|---------------------------------------------------------|--------------|--------------|-------------|--------------------------------------------------------|---------------------------------------|---------------------------------------|--------------------------------------|------------------------------------------|---------------|-------|
| <i>Caves with entrances close from riverside cliffs</i> |              |              |             |                                                        |                                       |                                       |                                      |                                          |               |       |
| Bergougous<br>(amalgam)                                 | 3.493        | 43.889       | 426         | 117                                                    | 77.87 $\pm$ 3.46                      | 20.15 $\pm$ 0.4                       | 1.12 +0.12/-0.13                     | 12.3 +1.1/-1                             | Vis           | ts    |
| Scorpions (amalgam)                                     | 3.625        | 43.885       | 275         | 85                                                     | 25.25 $\pm$ 1.12                      | 5.73 $\pm$ 0.15                       | 0.91 +0.15/-0.14                     | 46.9 +4.6/-4.6                           | Vis           | ts    |
| Scorpions (cobble 1)                                    | 3.625        | 43.885       | 275         | 85                                                     | 26.4 $\pm$ 1.09                       | 6.04 $\pm$ 0.13                       | 0.93 +0.13/-0.12                     | 43.9 +3.7/-3.7                           | Vis           | ts    |
| Scorpions (cobble 2)                                    | 3.625        | 43.885       | 275         | 85                                                     | 43.63 $\pm$ 1.83                      | 9.63 $\pm$ 0.24                       | 0.84 +0.13/-0.13                     | 27.9 +2.7/-2.4                           | Vis           | ts    |
| Scorpions (cobble 3)                                    | 3.625        | 43.885       | 275         | 85                                                     | 9.82 $\pm$ 0.58                       | 2.53 $\pm$ 0.08                       | 1.25 +0.2/-0.19                      | 96.2 +12.6/-11.2                         | Vis           | ts    |
| Scorpions (cobble 4)                                    | 3.625        | 43.885       | 275         | 85                                                     | 33.57 $\pm$ 1.35                      | 8.15 $\pm$ 0.2                        | 1.05 +0.12/-0.13                     | 29.9 +3/-2.4                             | Vis           | ts    |
| Scorpions (cobble 5)                                    | 3.625        | 43.885       | 275         | 85                                                     | 25.15 $\pm$ 1.22                      | 6.17 $\pm$ 0.17                       | 1.08 +0.16/-0.15                     | 39.9 +4.4/-4.1                           | Vis           | ts    |
| Escoutet (amalgam)                                      | 3.626        | 43.885       | 220         | 30                                                     | 20.44 $\pm$ 1.28                      | 5.72 $\pm$ 0.13                       | 1.39 $\pm$ 0.18                      | 35.8 +4.2/-3.9                           | Vis           | ts    |
| Escoutet (cobble 2)                                     | 3.626        | 43.885       | 220         | 30                                                     | 26.32 $\pm$ 2.37                      | 6.32 $\pm$ 0.15                       | 1.05 +0.25/-0.23                     | 37.9 +5.7/-5.1                           | Vis           | ts    |
| Escoutet (cobble 3)                                     | 3.626        | 43.885       | 220         | 30                                                     | 10.08 $\pm$ 0.51                      | 2.16 $\pm$ 0.11                       | 0.87 +0.23/-0.22                     | <sup>1</sup><br>34.1 +20.7/-19.4         | Vis           | ts    |
| Escoutet (cobble 5)                                     | 3.626        | 43.885       | 220         | 30                                                     | 20.4 $\pm$ 2.72                       | 4.47 $\pm$ 0.12                       | 0.87 +0.36/-0.32                     | 60 +11.5/-10.9                           | Vis           | ts    |
| Troglodyte<br>(amalgam)                                 | 3.469        | 43.744       | 485         | 435                                                    | 2.47 $\pm$ 0.63                       | 5.17 $\pm$ 0.13                       | 5.43 +0.59/-0.48                     | 5.6 +1.8/-1.6                            | Hérault       | ts    |
| Cave des Chiens                                         | 3.619        | 43.759       | 218         | 142                                                    | 3.61 $\pm$ 0.91                       | 2.18 $\pm$ 0.06                       | 3.33 +0.87/-0.65                     | 37.6 +16.2/-14.2                         | Hérault       | ts    |
| Bois de Merle 2                                         | 3.614        | 43.755       | 273         | 197                                                    | 9.96 $\pm$ 1.72                       | 8.44 $\pm$ 0.2                        | 4.1 +0.61/-0.47                      | 6.1 +2/-1.9                              | Hérault       | ts    |
| Garrel (Baignoire)                                      | 3.615        | 43.834       | 184         | 31                                                     | 30.51 $\pm$ 3.47                      | 9.26 $\pm$ 0.21                       | 1.46 +0.28/-0.25                     | 19.2 +3.2/-3.1                           | Hérault       | ts    |
| Garrel (Marmite)                                        | 3.615        | 43.834       | 200         | 47                                                     | 30.32 $\pm$ 2.16                      | 7.26 $\pm$ 0.17                       | 1 +0.19/-0.17                        | 32.1 +3.7/-3.7                           | Hérault       | ts    |

|                                                        |            |        |     |     |              |             |                                                                                                           |             |           |              |                         |       |
|--------------------------------------------------------|------------|--------|-----|-----|--------------|-------------|-----------------------------------------------------------------------------------------------------------|-------------|-----------|--------------|-------------------------|-------|
| Bord de Route (amalgam)                                | 3.709      | 43.954 | 175 | 20  | 21.6 ±0.15   | 3.54 ±1.18  | 0.39                                                                                                      | +0.94/-0.38 | 103<br>.7 | +22.6/-47.9  | Rieutord                | ts, M |
| Camp de Guerre (amalgam)                               | 3.710      | 43.955 | 190 | 30  | 42.9 ±0.31   | 8.87 ±3.28  | 0.7                                                                                                       | +0.62/-0.7  | 30        | +32.7/-14.3  | Rieutord                | ts, M |
| Dugou (amalgam)                                        | 3.710<br>5 | 43.957 | 245 | 80  | 4.29 ±0.06   | 1.27 ±0.33  | 1.6                                                                                                       | +0.54/-0.7  | 1<br>64.2 | +148.3/-66.4 | Rieutord                | ts, M |
| Cuillere (amalgam)                                     | 3.710<br>1 | 43.957 | 354 | 189 | 3.75 ±0.07   | 1.7 ±0.53   | 2.41                                                                                                      | +0.59/-0.83 | 82.5      | +103/-36.4   | Rieutord                | ts, M |
| Clauside (amalgam)                                     | 3.71       | 43.96  | 487 | 317 | 3.16 ±0.67   | 1.14 ±0.08  | <sup>26</sup> Al and <sup>10</sup> Be concentrations are inconsistent for a proper burial age computation |             |           | Rieutord     | ts                      |       |
| Gr. Calles (amalgam, balcony)                          | 3.537      | 43.964 | 470 | 190 | 64.52 ±2.79  | 24.73 ±0.57 | 1.89                                                                                                      | +0.13/-0.12 | 7.4       | ±0.7         | Arre                    | ts    |
| Gr. Calles (amalgam, bottom)                           | 3.537      | 43.964 | 470 | 190 | 13.41 ±1.67  | 7.67 ±0.17  | 2.77                                                                                                      | +0.29/-0.27 | 14.8      | +2.6/-2.3    | Arre                    | ts    |
| Gr. Calles (amalgam, bottom)                           | 3.537      | 43.964 | 470 | 190 | 16.6 ±1.12   | 7.87 ±0.18  | 2.4                                                                                                       | +0.17/-0.18 | 17.6      | +2.2/-1.8    | Arre                    | ts    |
| Gr. Calles (amalgam, top)                              | 3.537      | 43.964 | 480 | 200 | 36.02 ±2.88  | 14.67 ±0.31 | 2.05                                                                                                      | +0.2/-0.19  | 11        | +1.4/-1.3    | Arre                    | ts    |
| Gr. Calles (amalgam, entrance passage)                 | 3.537      | 43.964 | 510 | 230 | 50.83 ±3.07  | 20.27 ±0.5  | 1.99                                                                                                      | +0.15/-0.16 | 8.2       | +1/-0.8      | Arre                    | ts    |
| <b>Caves with entrances away from riverside cliffs</b> |            |        |     |     |              |             |                                                                                                           |             |           |              |                         |       |
| Rocas (amalgam)                                        | 3.482      | 43.841 | 310 | 552 | 171.96 ±7.17 | 41.35 ±0.87 | 0.93                                                                                                      | +0.11/-0.12 | 7         | +0.7/-0.5    | Vis                     | ts    |
| Rocas (amalgam, repeat)                                | 3.482      | 43.841 | 310 | 552 | 175.4 ±6.7   | 47.34 ±1.56 | 1.15                                                                                                      | +0.12/-0.14 | 5.4       | +0.6/-0.5    | Vis                     | ts    |
| Fonctionnaire (amalgam)                                | 3.467      | 43.805 | 278 | 520 | 207.82 ±9.87 | 39.73 ±0.78 | 0.47                                                                                                      | ±0.13       | 9.1       | +0.9/-0.8    | Vis or Herault          | ts    |
| Fonctionnaire (amalgam, repeat)                        | 3.467      | 43.805 | 278 | 520 | 226.86 ±8.79 | 38.89 ±0.98 | 0.26                                                                                                      | ±0.12       | 10.5      | +1/-0.9      | Vis or Herault          | ts    |
| Huttes (amalgam, bottom)                               | 3.496      | 43.814 | 463 | 705 | 1.43 ±0.46   | 0.95 ±0.04  | 3.18                                                                                                      | +0.93/-0.68 | 1<br>33.6 | +63.1/-52.6  | Vis                     | ts    |
| Huttes (amalgam, top)                                  | 3.496      | 43.814 | 473 | 715 | 7.35 ±1.46   | 10.67 ±0.23 | 5.99                                                                                                      | +1.19/-0.76 | 2.6       | +1.5/-1.4    | Vis                     | ts    |
| Leicasse (amalgam, gours sur pattes)                   | 3.558      | 43.817 | 245 | 460 | 44.55 ±1.87  | 9.9 ±0.21   | 0.84                                                                                                      | +0.13/-0.12 | 31.1      | ±2.6         | Vis or Herault (Bueges) | ts    |
| Leicasse (amalgam,                                     | 3.558      | 43.817 | 220 | 435 | 33.61 ±1.4   | 7.55 ±0.16  | 0.87                                                                                                      | +0.13/-0.11 | 39.7      | +3.3/-3.4    | Vis or Herault          | ts    |

|                                  |       |        |     |     |            |            |       |             |       |               |  |                         |    |
|----------------------------------|-------|--------|-----|-----|------------|------------|-------|-------------|-------|---------------|--|-------------------------|----|
| Première Salle)                  |       |        |     |     |            |            |       |             |       |               |  | (Bueges)                |    |
| Leicasse (cobble 1, coulee Borg) | 3.558 | 43.817 | 240 | 455 | 1.32 ±0.4  | 1.44 ±0.04 | 4.15  | +0.78/-0.58 | 41.2  | +15.9/-14.4   |  | Vis or Herault (Bueges) | ts |
| Leicasse (cobble 2, coulee Borg) | 3.558 | 43.817 | 240 | 455 | 1.58 ±0.15 | 1.15 ±0.05 | 3.31  | +0.28/-0.25 | 80.1  | +14.5/-13.6   |  | Vis or Herault (Bueges) | ts |
| Leicasse (cobble 3, coulee Borg) | 3.558 | 43.817 | 240 | 455 | 1.13 ±0.33 | 0.46 ±0.04 | 2.18  | +0.85/-0.7  | 358.3 | +197.3/-141.5 |  | Vis or Herault (Bueges) | ts |
| Leicasse (cobble 5, coulee Borg) | 3.558 | 43.817 | 240 | 455 | 1.41 ±0.48 | 0.41 ±0.04 | 1.46  | +1.03/-0.8  | 583.7 | +378.4/-266.9 |  | Vis or Herault (Bueges) | ts |
| Leicasse (cobble 6, coulee Borg) | 3.558 | 43.817 | 240 | 455 | 1.79 ±0.6  | 1.13 ±0.04 | 3.03  | +0.89/-0.65 | 93.8  | +41.8/-36.3   |  | Vis or Herault (Bueges) | ts |
| <b>Other studies</b>             |       |        |     |     |            |            |       |             |       |               |  |                         |    |
| Caze n°1                         | 3.279 | 44.207 | --- | 80  | ---        | ---        | 1.75  | ±0.3        | ---   | ---           |  | Tarn                    | S  |
| Airetta                          | 3.301 | 44.210 | --- | 80  | ---        | ---        | 1.49  | ±0.3        | ---   | ---           |  | Jonte                   | S  |
| Amélineau                        | 3.311 | 44.206 | --- | 45  | ---        | ---        | 0.49  | ±0.3        | ---   | ---           |  | Jonte                   | S  |
| Dargilan                         | 3.377 | 44.196 | --- | 270 | ---        | ---        | 3.55  | ±0.2        | ---   | ---           |  | Jonte                   | S  |
| Devès-Méjean                     | 3.331 | 44.208 | --- | 160 | ---        | ---        | 2.6   | ±0.6        | ---   | ---           |  | Jonte                   | S  |
| Gr. Nabrigas                     | 3.382 | 44.202 | --- | 290 | ---        | ---        | 3.6   | ±0.2        | ---   | ---           |  | Jonte                   | S  |
| Jas del Rabier                   | 3.364 | 44.206 | --- | 250 | ---        | ---        | 2.55  | ±0.4        | ---   | ---           |  | Jonte                   | S  |
| Poujol                           | 3.363 | 44.204 | --- | 220 | ---        | ---        | 2.35  | ±0.2        | ---   | ---           |  | Jonte                   | S  |
| Travertin « Via »                | 3.024 | 44.087 | --- | 25  |            | OSL Dating | 0.075 | ±0.01       | ---   | ---           |  | Tarn                    | V  |
| Travertin « Comp »               | 2.990 | 44.087 | --- | 25  |            | OSL Dating | 0.074 | ±0.009      | ---   | ---           |  | Tarn                    | V  |
| Travertins « Roq »               | 3.051 | 44.085 | --- | 35  |            | OSL Dating | 0.273 | ±0.023      | ---   | ---           |  | Tarn                    | V  |
